# Supplementary material for: Hsa-miR-1246, hsa-miR-320a and hsa-miR-196b-5p inhibitors can reduce the cytotoxicity of Ebola virus glycoprotein in vitro
Source: Springer Nature journal article supplement (doi:10.1007/s11427-014-4742-y), 2014-09-13
Supplement: 11427_2014_4742_MOESM1_ESM.pdf [file 11427_2014_4742_MOESM1_ESM.pdf]

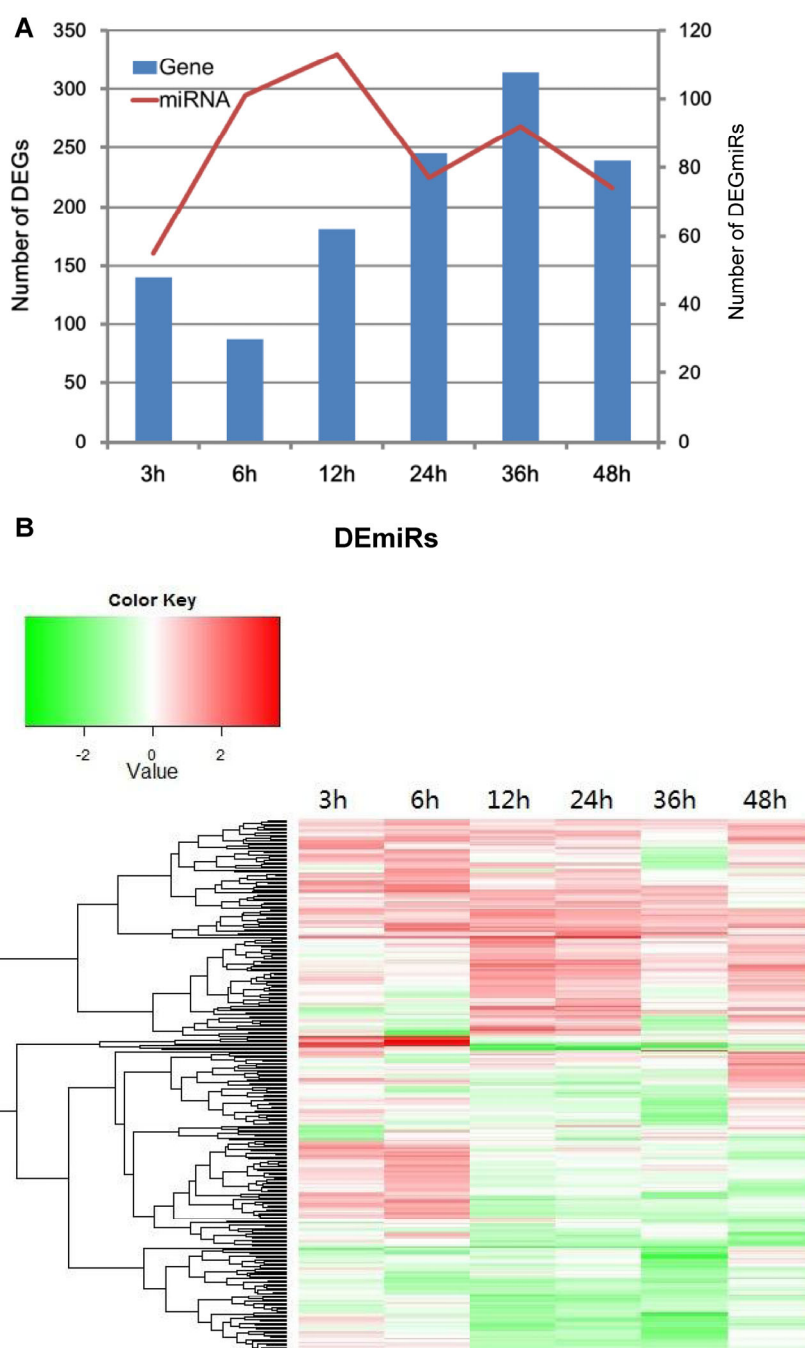

**Figure S1** Differentially expressed miRNAs (DEMiRs) and differentially expressed genes (DEGs) in the process of glycoprotein-induced vascular endothelial cell injury. A, Number of differentially expressed miRNAs (DEMiRs) and differentially expressed mRNA (DEGs). B, Heat map showing time-course fold changes of DEMiRs in glycoprotein-induced vascular endothelial cell injury. A red block indicates up-regulated genes and a green block indicates down-regulated genes.

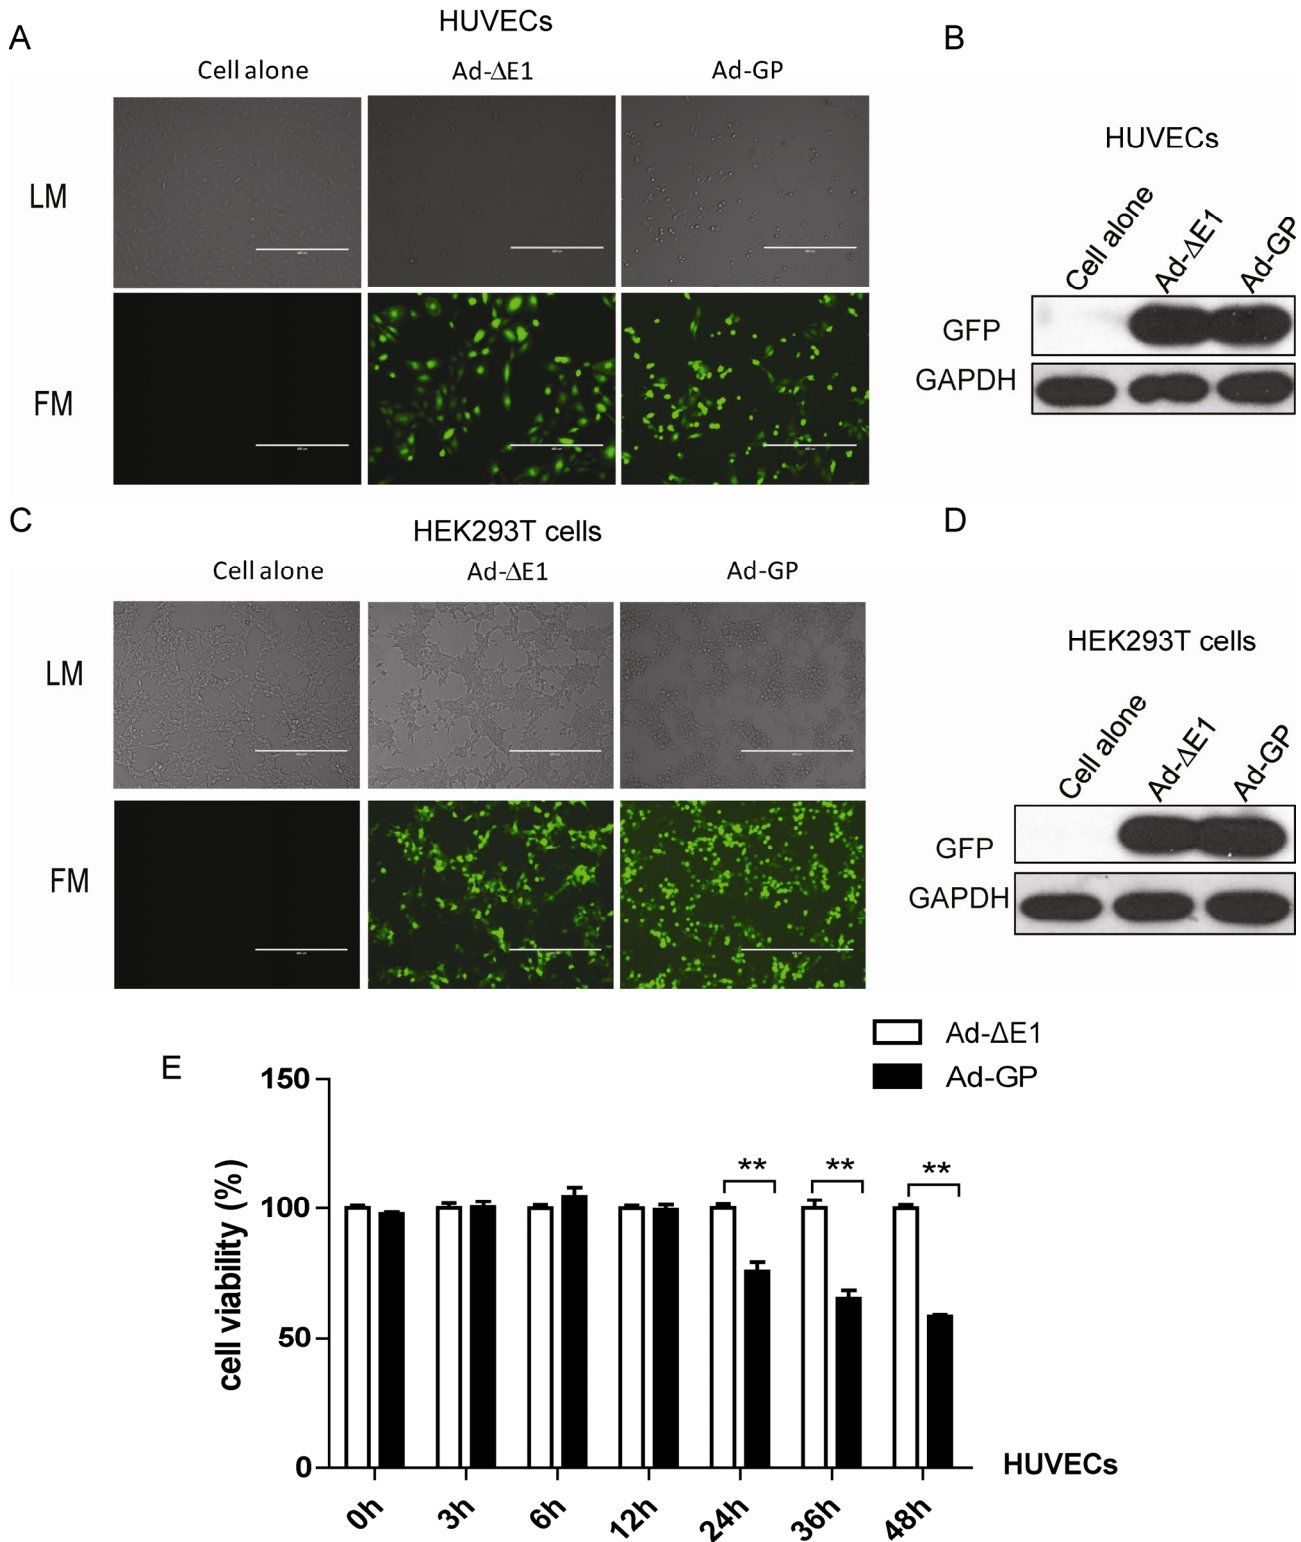

**Figure S2** Ebola virus GP expression induced cell rounding and death. Adenovirus vectors expressing EboZ GP or mock were used to transduce primary HUVECs (MOI, 500) (A) and 293T cells (MOI, 1) (C). The cells were monitored at regular intervals for evidence of cell rounding, and representative photographs were taken at 48 h post-transduction. B and D, Western blotting analysis of the expression level of green fluorescent protein (GFP protein). E, MTS assay results for HUVECs transduced with Ad-GP or Ad- $\Delta$ E1 (MOI, 500) for 3, 6, 12, 24, 36, and 48 h. \*\*,  $P < 0.01$ , Ad-GP vs. Ad- $\Delta$ E1.

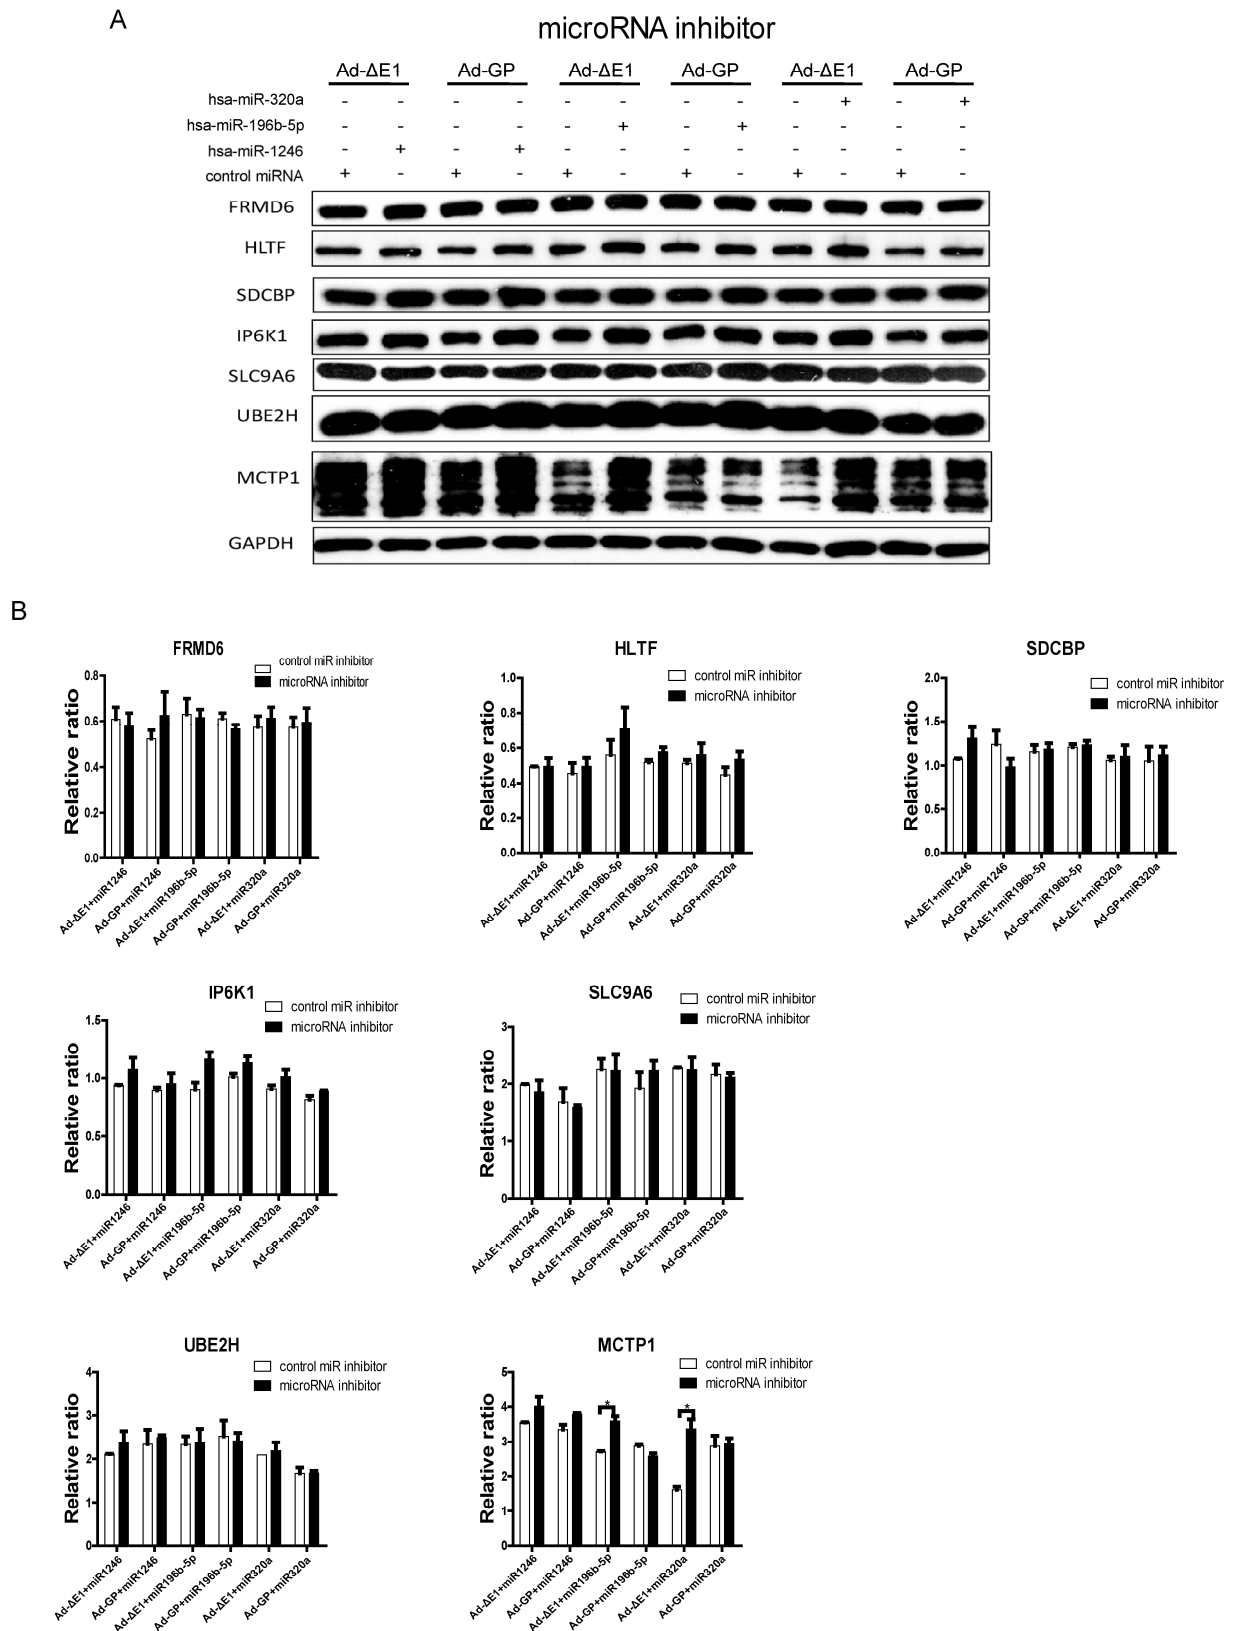

**Figure S3** Analysis of target genes of miRNAs by Western blot. A, Hsa-miR1246, hsa-miR320a and hsa-miR196b-5p inhibitors (final concentration, 100 nmol L<sup>-1</sup>) were transfected into HUVECs 24 h before the cells were exposed to Ad-GP and Ad-ΔE1 (MOI, 500). Target gene expression was analyzed at 24 h post-transduction by Western blot. The blots were analyzed with antibodies against the indicated proteins. B, The bar graph shows the FRMD6/GAPDH, HLTF/GAPDH, SDCBP/GAPDH, IP6K1/GAPDH, SLC9A6/GAPDH, UBE2H/GAPDH and MCTP1/GAPDH relative ratios from three experiments. \*, *P*<0.05.

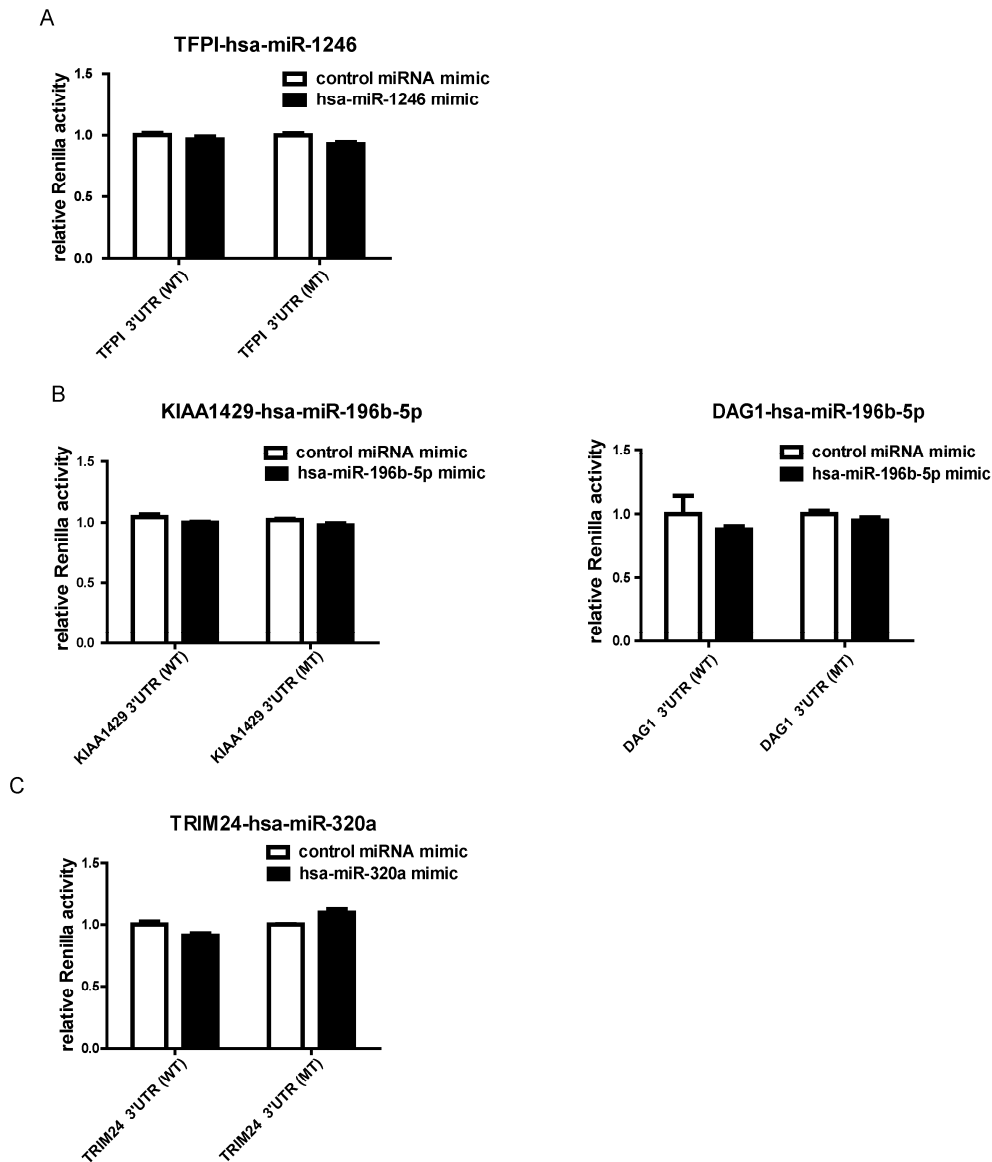

**Figure S4** Analysis of miRNA target genes by luciferase. A, Relative luciferase activity assays of Renilla luciferase reporters with *TFPI* wild-type or mutant 3' UTRs were performed in HEK293T cells after transfection with control mimic or hsa-miR-1246 mimic. Luciferase activity was determined 48 h after transfection and was normalized to the firefly luciferase activity. The values represent the mean $\pm$ SEM of three experiments from three independent assays. B, Relative luciferase activity assays of Renilla luciferase reporters with *KIAA1429* or *DAG1* wild-type or mutant 3' UTRs were performed in HEK293T cells after transfection with mimic control or mimic hsa-miR-196b-5p. Luciferase activity was determined 48 h after transfection and was normalized to the firefly luciferase activity. The values represent the mean $\pm$ SEM of three experiments from three independent assays. C, Relative luciferase activity assays of Renilla luciferase reporters with *TRIM24* wild-type or mutant 3' UTRs were performed in HEK293T cells after transfection with control mimic or hsa-miR-320a mimic. Luciferase activity was determined 48 h after transfection and was normalized to the firefly luciferase activity. The values represent the mean $\pm$ SEM of three experiments from three independent assays.

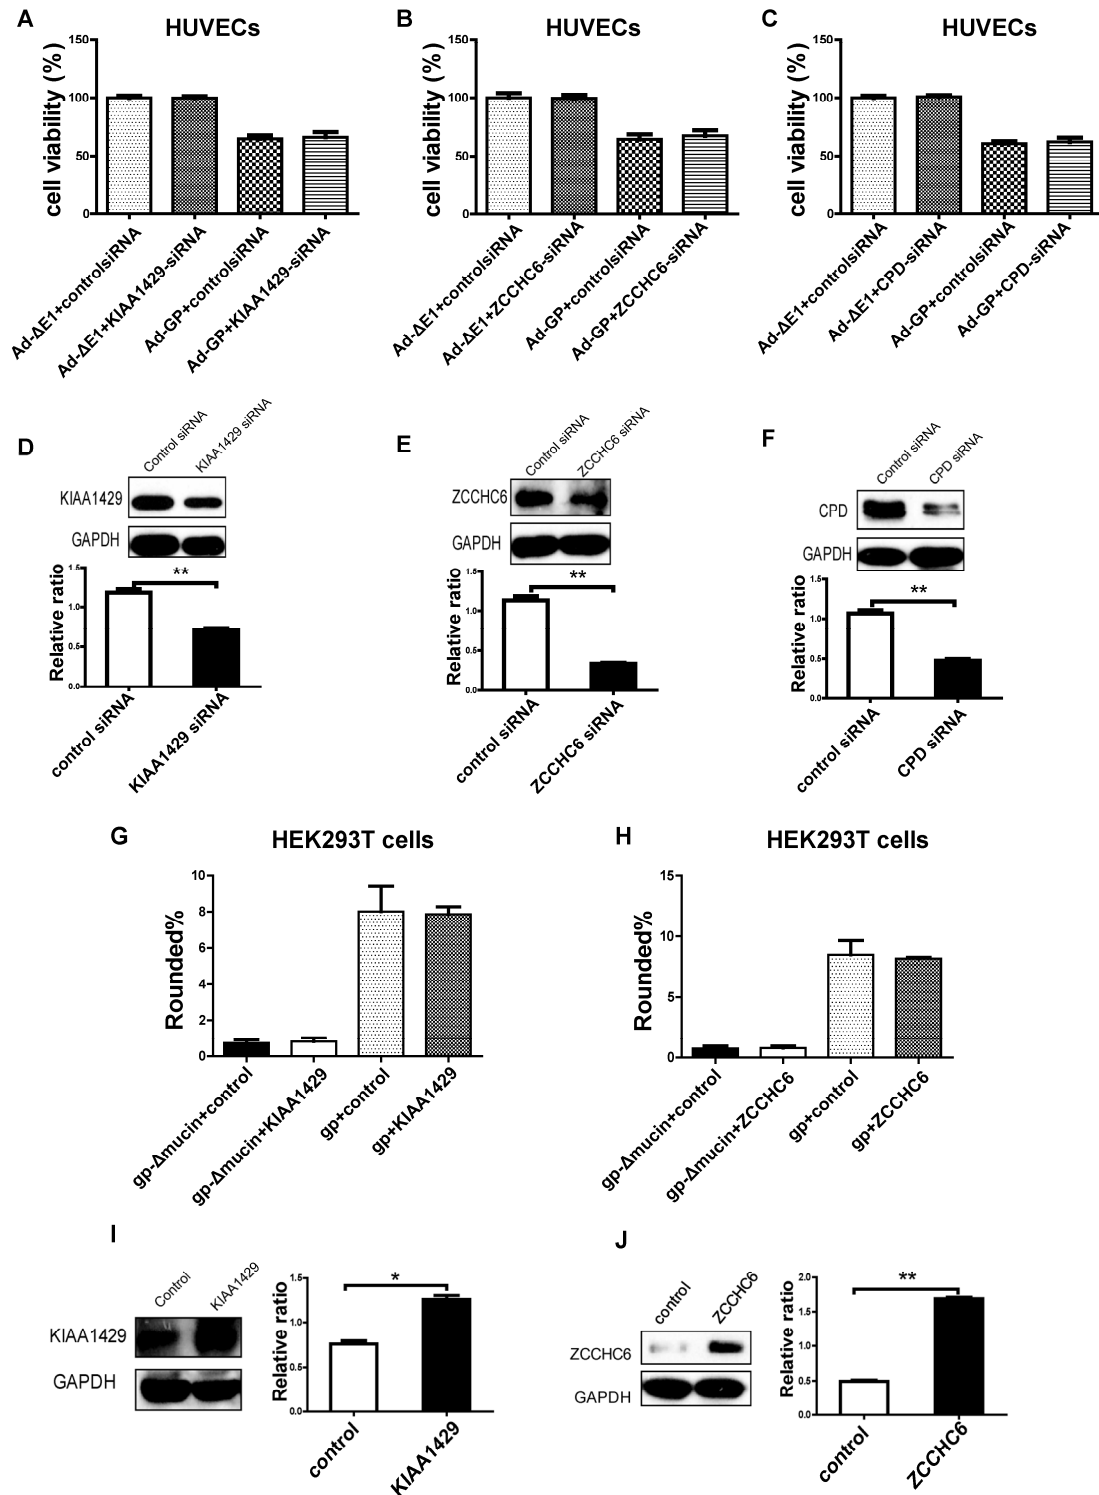

**Figure S5** KIAA1429, ZCCHC6 and CPD could not ameliorate Ebola virus GP-induced cytotoxicity. Control siRNA or KIAA1429-specific siRNA (A)/ZCCHC6-specific siRNA (B)/CPD-specific siRNA (C) were transfected into HUVECs 24 h before the cells were exposed to Ad-GP and Ad-ΔE1 (MOI, 500), cell viability was assayed by MTS at 48 h after transduction. The data are from three experiments. Western blotting analysis of the effectiveness of KIAA1429 (D), ZCCHC6 (E) or CPD (F) knockdown in HUVECs. The bar graph indicates KIAA1429/GAPDH, ZCCHC6/GAPDH and CPD/GAPDH relative ratios. The data are shown as the mean±SEM of three experiments. \*\*,  $P<0.01$ . HEK293T cells were cotransfected with 0.5 μg of EboZ GP or EboZ GPΔmucin and 0.5 μg of control plasmid/Peak13-KIAA1429 (G)/Peak13-ZCCHC6 (H). The cells were incubated for 48 h, and both floating and adherent cells were counted to calculate percent rounding. The data are from three experiments. Western blotting analysis of the effectiveness of overexpression of KIAA1429 (I) or ZCCHC6 (J) in HEK293T cells. The bar graph indicates the KIAA1429/GAPDH and ZCCHC6/GAPDH relative ratios. The data are shown as the mean±SEM of three experiments. \*,  $P<0.05$ ; \*\*,  $P<0.01$ .

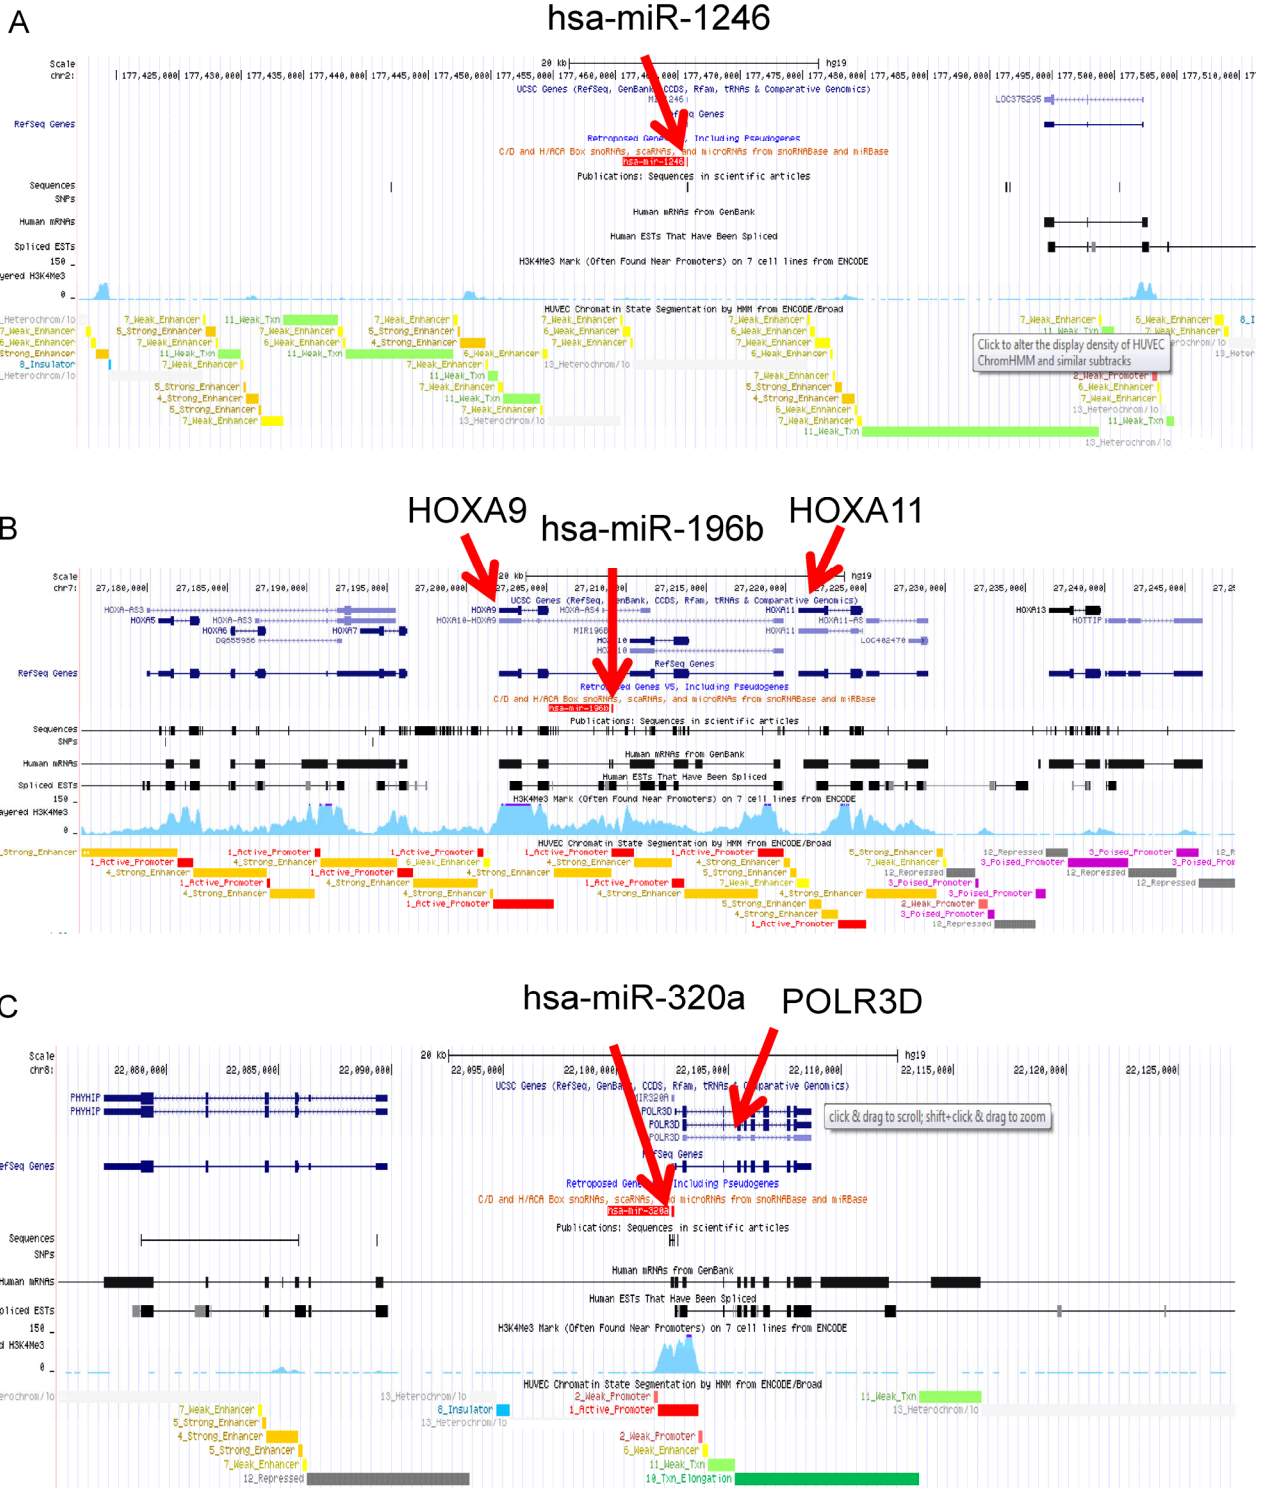

**Figure S6** Genomic locations of microRNAs hsa-miR-1246, hsa-miR-196b-5p and hsa-miR-320a. Different genomic locations of microRNAs hsa-miR-1246, hsa-miR-196b-5p and hsa-miR-320a were analyzed by the UCSC data base (<http://genome.ucsc.edu/cgi-bin/hgGateway>).

**Table S1** Primer sequences

|                              |                                     |                                                                 |
|------------------------------|-------------------------------------|-----------------------------------------------------------------|
| GP $\Delta$ mucin (AA1-311)  | CATGCTAGCCATGGGCGTTACAGGA           | GTCCTGGTGGTGGGTGTTGACCACGGTGAAGCTCAG                            |
| GP $\Delta$ mucin(AA463-676) | CTGAGCTTACCCTGGTCAACACCCACCACCAGGAC | CCTGCGGCCGCCTATTAGAACACGAACTTGCA                                |
| TFPI                         | CATGCTAGCCATGATTTACACAATGAAGAAAGTAC | CGCGCGCCGCTTACTTGTTCATCGTCGTCC<br>TTGTAGTCCATATTTTTAACAAAATTTTC |
| DAG1                         | CATGCTAGCCATGAGGATGTCTGTGGGCCT      | CGCGCGCCGCTTACTTGTTCATCGTCGTCC<br>TTGTAGTCAGGTGGGACATAGGGAGGAG  |
| CFLAR                        | CATGCTAGCCATGTCTGCTGAAGTCATCCATCAGG | CGCGCGCCGCTTACTTGTTCATCGTCGTCC<br>TTGTAGTCTGTGTAGGAGAGGATAAG    |
| KIAA1429                     | ATA GCTAGC ATGGCGGTG GACTCGGCGA     | TATGCGGCCGCTTAAAAAGTGTACTGCAGTCATTT                             |
| ZCCHC6                       | ATA GCTAGC ATGGGAGATA CAGCAAAA      | TATGCGGCCGCTCATGATTCTCTGCTGGGT                                  |

**Table S2** Primary antibodies

| Product name                             | Company, code               | Dilution |
|------------------------------------------|-----------------------------|----------|
| anti-TFPI rabbit monoclonal antibody     | Epitomics, RabMAb5853-1     | 1/1000   |
| anti-DAG1 rabbit polyclonal antibody     | Abcam, ab105504             | 1/1000   |
| anti-CFLAR rabbit monoclonal antibody    | cst, 8510                   | 1/500    |
| anti-ZCCHC6 mouse polyclonal antibody    | Abcam, ab76901              | 1/200    |
| anti-CPD rabbit polyclonal antibody      | Abcam, ab153874             | 1/500    |
| anti-TRIM24 rabbit polyclonal antibody   | Abcam, ab70560              | 1/1000   |
| anti-KIAA1429 rabbit polyclonal antibody | Abcam, ab11011              | 1/1000   |
| anti-FRMD6 rabbit polyclonal antibody    | Abcam, ab121133             | 1/500    |
| anti-HLTF rabbit polyclonal antibody     | Abcam, ab155031             | 1/500    |
| anti-SDCBP rabbit monoclonal antibody    | Epitomics, RabMAb 5913-1    | 1/2000   |
| anti-IP6K1 rabbit polyclonal antibody    | Abcam, ab96210              | 1/500    |
| anti-SLC9A6 mouse monoclonal antibody    | Abcam, ab77110              | 1/200    |
| anti-UBE2H mouse monoclonal antibody     | Abcam, ab58261              | 1/1000   |
| anti-MCTP1 rabbit polyclonal antibody    | Abcam, ab83673              | 1/500    |
| anti-GAPDH rabbit monoclonal antibody    | Epitomic, RabMAb 5632-1     | 1/2000   |
| anti flag-tag mouse mAb                  | Multisciences, LK-ab002-100 | 1/5000   |

**Table S3** Expression fold change of 18 miRNAs which were found to be significantly differentially expressed in the GP-induced HUVECs

| No. | miRNA           | 3 h      | 6 h      | 12 h     | 24 h     | 36 h     | 48 h     | Order of oligonucleotides |
|-----|-----------------|----------|----------|----------|----------|----------|----------|---------------------------|
| 1   | hsa-miR-151a-5p | 1.269094 | 1.147848 | 1.662109 | 1.293469 | 0.974547 | 1.110217 | inhibitor                 |
| 2   | hsa-miR-152     | 0.532175 | 0.52408  | 1.425069 | 1.167242 | 1.016099 | 0.778609 | inhibitor                 |
| 3   | hsa-miR-22-3p   | -0.05163 | 0.984645 | 1.364907 | 1.054959 | 0.05183  | 0.886469 | inhibitor                 |
| 4   | hsa-miR-196b-5p | 0.395463 | 1.028573 | 1.152811 | 1.206606 | 0.400748 | -0.04454 | inhibitor                 |
| 5   | hsa-miR-424-5p  | 0.195012 | -0.44247 | 1.304861 | 1.030804 | -0.46495 | 1.008352 | inhibitor                 |
| 6   | hsa-miR-374a-5p | 1.14883  | -1.17302 | 1.207216 | 0.259833 | -0.03382 | 0.845957 | both                      |
| 7   | hsa-miR-24-3p   | 0.880868 | 1.111113 | 0.761909 | 0.401233 | 0.207918 | 0.998961 | inhibitor                 |
| 8   | hsa-miR-744-5p  | 0.998487 | 1.339037 | 0.881082 | 0.594796 | -0.05134 | 0.599302 | inhibitor                 |
| 9   | hsa-miR-222-3p  | 1.497371 | 1.559117 | 0.405156 | 0.129881 | 0.382795 | 1.230315 | inhibitor                 |
| 10  | hsa-miR-4521    | 0.956015 | 1.138905 | -0.08723 | -0.8054  | -0.33448 | 1.147574 | both                      |
| 11  | hsa-miR-34a-5p  | 1.262469 | 0.897093 | 0.005463 | 0.158376 | -1.07796 | 0.41306  | inhibitor                 |
| 12  | hsa-miR-1246    | 2.541367 | 2.950668 | -0.64206 | -0.24144 | 0.248045 | -0.24214 | both                      |
| 13  | hsa-miR-93-5p   | 0.361414 | 1.102215 | -0.39996 | -0.15847 | -0.12624 | -0.23836 | both                      |
| 14  | hsa-miR-193a-5p | 0.543579 | 1.261469 | -0.93546 | -0.61432 | -0.62781 | -0.19474 | both                      |
| 15  | hsa-miR-320a    | 0.067418 | 1.107549 | -0.9758  | -0.6253  | -0.584   | -0.44248 | both                      |
| 16  | hsa-miR-15b-5p  | 0.599424 | -0.61668 | -0.36254 | -1.02625 | -1.75719 | 0.400898 | mimic                     |
| 17  | hsa-miR-29a-3p  | -0.6986  | -0.22843 | -1.56439 | -1.0775  | -0.69906 | -0.29281 | mimic                     |
| 18  | hsa-miR-29c-3p  | -0.47883 | -0.45975 | -1.78741 | -1.26871 | -1.35619 | -0.31176 | mimic                     |
